# Supplementary material for: Desymmetrizing Heteroleptic [Cu(P^P)(N^N)][PF6] Compounds: Effects on Structural and Photophysical Properties, and Solution Dynamic Behavior
Source: MDPI journal article supplement (doi:10.3390/molecules26010125), 2020-12-29

# checkCIF/PLATON report

Structure factors have been supplied for datablock(s) BRF160\_123K

THIS REPORT IS FOR GUIDANCE ONLY. IF USED AS PART OF A REVIEW PROCEDURE FOR PUBLICATION, IT SHOULD NOT REPLACE THE EXPERTISE OF AN EXPERIENCED CRYSTALLOGRAPHIC REFEREE.

No syntax errors found.      CIF dictionary      Interpreting this report

## Datablock: BRF160\_123K

---

Bond precision:    C-C = 0.0051 Å                      Wavelength=1.54180

Cell:                a=10.9834(7)                b=15.5458(9)                c=18.6079(11)  
                      alpha=110.395(2)        beta=94.433(2)        gamma=110.363(2)  
Temperature:    123 K

|                        | Calculated                              | Reported                                 |
|------------------------|-----------------------------------------|------------------------------------------|
| Volume                 | 2719.7(3)                               | 2719.7(3)                                |
| Space group            | P -1                                    | P -1                                     |
| Hall group             | -P 1                                    | -P 1                                     |
| Moiety formula         | C59 H49 Cu N5 O P2, F6 P<br>[+ solvent] | [C59 H49 Cu1 N5 O1<br>P2][PF6] 0.5(ET2O) |
| Sum formula            | C59 H49 Cu F6 N5 O P3 [+<br>solvent]    | C61 H54 Cu1 F6 N5 O1.50 P3               |
| Mr                     | 1114.49                                 | 1151.59                                  |
| Dx, g cm <sup>-3</sup> | 1.361                                   | 1.410                                    |
| Z                      | 2                                       | 2                                        |
| Mu (mm <sup>-1</sup> ) | 1.956                                   | 1.981                                    |
| F000                   | 1148.0                                  | 1190.0                                   |
| F000'                  | 1149.08                                 |                                          |
| h,k,lmax               | 13,18,22                                | 13,18,22                                 |
| Nref                   | 10371                                   | 10070                                    |
| Tmin,Tmax              | 0.788,0.906                             | 0.770,0.910                              |
| Tmin'                  | 0.788                                   |                                          |

Correction method= # Reported T Limits: Tmin=0.770 Tmax=0.910  
AbsCorr = MULTI-SCAN

Data completeness= 0.971                      Theta(max)= 70.359

R(reflections)= 0.0628( 9303)                wR2(reflections)= 0.1626( 10017)

S = 1.048                                      Npar= 682

---

The following ALERTS were generated. Each ALERT has the format

**test-name\_ALERT\_alert-type\_alert-level.**

Click on the hyperlinks for more details of the test.

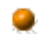

#### Alert level B

PLAT201\_ALERT\_2\_B Isotropic non-H Atoms in Main Residue(s) ..... 6 Report  
PLAT910\_ALERT\_3\_B Missing # of FCF Reflection(s) Below Theta(Min). 46 Note

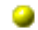

#### Alert level C

CHEMW03\_ALERT\_2\_C The ratio of given/expected molecular weight as  
calculated from the \_atom\_site\* data lies outside  
the range 0.99 <> 1.01  
From the CIF: \_cell\_formula\_units\_Z 2  
From the CIF: \_chemical\_formula\_weight 1151.59  
TEST: Calculate formula weight from \_atom\_site\_\*  

| atom | mass  | num   | sum    |
|------|-------|-------|--------|
| C    | 12.01 | 59.00 | 708.65 |
| H    | 1.01  | 49.00 | 49.39  |
| N    | 14.01 | 5.00  | 70.04  |
| O    | 16.00 | 1.00  | 16.00  |
| F    | 19.00 | 6.00  | 113.99 |
| P    | 30.97 | 3.00  | 92.92  |
| Cu   | 63.55 | 1.00  | 63.55  |

  
Calculated formula weight 1114.53  
PLAT094\_ALERT\_2\_C Ratio of Maximum / Minimum Residual Density .... 2.28 Report  
PLAT220\_ALERT\_2\_C Non-Solvent Resd 1 C Ueq(max)/Ueq(min) Range 5.4 Ratio  
PLAT222\_ALERT\_3\_C Non-Solv. Resd 1 H Uiso(max)/Uiso(min) Range 5.2 Ratio  
PLAT241\_ALERT\_2\_C High 'MainMol' Ueq as Compared to Neighbors of C56 Check  
PLAT330\_ALERT\_2\_C Large Average Phenyl C-C Dist C2 -C24 1.42 Ang.  
PLAT911\_ALERT\_3\_C Missing FCF Refl Between Thmin & STh/L= 0.600 79 Report  
PLAT918\_ALERT\_3\_C Reflection(s) with I(obs) much Smaller I(calc) . 2 Check

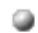

#### Alert level G

FORMU01\_ALERT\_1\_G There is a discrepancy between the atom counts in the  
\_chemical\_formula\_sum and \_chemical\_formula\_moiety. This is  
usually due to the moiety formula being in the wrong format.  
Atom count from \_chemical\_formula\_sum: C61 H54 Cu1 F6 N5 O1.5 P3  
Atom count from \_chemical\_formula\_moiety:  
FORMU01\_ALERT\_2\_G There is a discrepancy between the atom counts in the  
\_chemical\_formula\_sum and the formula from the \_atom\_site\* data.  
Atom count from \_chemical\_formula\_sum: C61 H54 Cu1 F6 N5 O1.5 P3  
Atom count from the \_atom\_site data: C59 H49 Cu1 F6 N5 O1 P3  
CELLZ01\_ALERT\_1\_G Difference between formula and atom\_site contents detected.  
CELLZ01\_ALERT\_1\_G ALERT: Large difference may be due to a  
symmetry error - see SYMMG tests  
From the CIF: \_cell\_formula\_units\_Z 2  
From the CIF: \_chemical\_formula\_sum C61 H54 Cu1 F6 N5 O1.50 P3  
TEST: Compare cell contents of formula and atom\_site data  

| atom | Z*formula | cif sites | diff  |
|------|-----------|-----------|-------|
| C    | 122.00    | 118.00    | 4.00  |
| H    | 108.00    | 98.00     | 10.00 |
| Cu   | 2.00      | 2.00      | 0.00  |
| F    | 12.00     | 12.00     | 0.00  |
| N    | 10.00     | 10.00     | 0.00  |
| O    | 3.00      | 2.00      | 1.00  |
| P    | 6.00      | 6.00      | 0.00  |

  
PLAT003\_ALERT\_2\_G Number of Uiso or Uij Restrained non-H Atoms ... 81 Report

|                   |                                                  |                |              |
|-------------------|--------------------------------------------------|----------------|--------------|
| PLAT041_ALERT_1_G | Calc. and Reported SumFormula                    | Strings Differ | Please Check |
| PLAT042_ALERT_1_G | Calc. and Reported MoietyFormula                 | Strings Differ | Please Check |
| PLAT068_ALERT_1_G | Reported F000 Differs from Calcd (or Missing)... |                | Please Check |
| PLAT093_ALERT_1_G | No s.u.'s on H-positions, Refinement Reported as |                | mixed Check  |
| PLAT154_ALERT_1_G | The s.u.'s on the Cell Angles are Equal ..(Note) |                | 0.002 Degree |
| PLAT232_ALERT_2_G | Hirshfeld Test Diff (M-X) Cul                    | --P1           | 5.5 s.u.     |
| PLAT244_ALERT_4_G | Low 'Solvent' Ueq as Compared to Neighbors of    |                | P3 Check     |
| PLAT300_ALERT_4_G | Atom Site Occupancy of C2                        | Constrained at | 0.7 Check    |
| PLAT300_ALERT_4_G | Atom Site Occupancy of C21                       | Constrained at | 0.7 Check    |
| PLAT300_ALERT_4_G | Atom Site Occupancy of C24                       | Constrained at | 0.7 Check    |
| PLAT300_ALERT_4_G | Atom Site Occupancy of C44                       | Constrained at | 0.7 Check    |
| PLAT300_ALERT_4_G | Atom Site Occupancy of C51                       | Constrained at | 0.7 Check    |
| PLAT300_ALERT_4_G | Atom Site Occupancy of C55                       | Constrained at | 0.7 Check    |
| PLAT300_ALERT_4_G | Atom Site Occupancy of C1                        | Constrained at | 0.3 Check    |
| PLAT300_ALERT_4_G | Atom Site Occupancy of C58                       | Constrained at | 0.3 Check    |
| PLAT300_ALERT_4_G | Atom Site Occupancy of C59                       | Constrained at | 0.3 Check    |
| PLAT300_ALERT_4_G | Atom Site Occupancy of C70                       | Constrained at | 0.3 Check    |
| PLAT300_ALERT_4_G | Atom Site Occupancy of C71                       | Constrained at | 0.3 Check    |
| PLAT300_ALERT_4_G | Atom Site Occupancy of C72                       | Constrained at | 0.3 Check    |
| PLAT300_ALERT_4_G | Atom Site Occupancy of H21                       | Constrained at | 0.7 Check    |
| PLAT300_ALERT_4_G | Atom Site Occupancy of H241                      | Constrained at | 0.7 Check    |
| PLAT300_ALERT_4_G | Atom Site Occupancy of H441                      | Constrained at | 0.7 Check    |
| PLAT300_ALERT_4_G | Atom Site Occupancy of H511                      | Constrained at | 0.7 Check    |
| PLAT300_ALERT_4_G | Atom Site Occupancy of H551                      | Constrained at | 0.7 Check    |
| PLAT300_ALERT_4_G | Atom Site Occupancy of H11                       | Constrained at | 0.3 Check    |
| PLAT300_ALERT_4_G | Atom Site Occupancy of H581                      | Constrained at | 0.3 Check    |
| PLAT300_ALERT_4_G | Atom Site Occupancy of H701                      | Constrained at | 0.3 Check    |
| PLAT300_ALERT_4_G | Atom Site Occupancy of H711                      | Constrained at | 0.3 Check    |
| PLAT300_ALERT_4_G | Atom Site Occupancy of H721                      | Constrained at | 0.3 Check    |
| PLAT300_ALERT_4_G | Atom Site Occupancy of F1                        | Constrained at | 0.7 Check    |
| PLAT300_ALERT_4_G | Atom Site Occupancy of F2                        | Constrained at | 0.7 Check    |
| PLAT300_ALERT_4_G | Atom Site Occupancy of F3                        | Constrained at | 0.7 Check    |
| PLAT300_ALERT_4_G | Atom Site Occupancy of F6                        | Constrained at | 0.7 Check    |
| PLAT300_ALERT_4_G | Atom Site Occupancy of F7                        | Constrained at | 0.3 Check    |
| PLAT300_ALERT_4_G | Atom Site Occupancy of F8                        | Constrained at | 0.3 Check    |
| PLAT300_ALERT_4_G | Atom Site Occupancy of F9                        | Constrained at | 0.3 Check    |
| PLAT300_ALERT_4_G | Atom Site Occupancy of F10                       | Constrained at | 0.3 Check    |
| PLAT301_ALERT_3_G | Main Residue Disorder .....(Resd 1 )             |                | 9% Note      |
| PLAT302_ALERT_4_G | Anion/Solvent/Minor-Residue Disorder (Resd 2 )   |                | 57% Note     |
| PLAT605_ALERT_4_G | Largest Solvent Accessible VOID in the Structure |                | 74 A**3      |
| PLAT808_ALERT_5_G | No Parseable SHELXL Style Weighting Scheme Found |                | Please Check |
| PLAT860_ALERT_3_G | Number of Least-Squares Restraints .....         |                | 708 Note     |
| PLAT869_ALERT_4_G | ALERTS Related to the Use of SQUEEZE Suppressed  |                | ! Info       |
| PLAT882_ALERT_1_G | No Datum for _diffrn_reflns_av_unetI/netI .....  |                | Please Do !  |
| PLAT912_ALERT_4_G | Missing # of FCF Reflections Above STh/L= 0.600  |                | 230 Note     |
| PLAT929_ALERT_5_G | No Weight Pars,Obs and Calc R1,wR2,S not Checked |                | ! Info       |
| PLAT960_ALERT_3_G | Number of Intensities with I < - 2*sig(I) ...    |                | 3 Check      |

---

0 **ALERT level A** = Most likely a serious problem - resolve or explain  
 2 **ALERT level B** = A potentially serious problem, consider carefully  
 8 **ALERT level C** = Check. Ensure it is not caused by an omission or oversight  
 52 **ALERT level G** = General information/check it is not something unexpected

9 ALERT type 1 CIF construction/syntax error, inconsistent or missing data  
 9 ALERT type 2 Indicator that the structure model may be wrong or deficient  
 7 ALERT type 3 Indicator that the structure quality may be low  
 35 ALERT type 4 Improvement, methodology, query or suggestion  
 2 ALERT type 5 Informative message, check

---

## Validation response form

Please find below a validation response form (VRF) that can be filled in and pasted into your CIF.

```
# start Validation Reply Form
_vrf_CHEMW03_BRF160_123K
;
PROBLEM: The ratio of given/expected molecular weight as
RESPONSE: ...
;
_vrf_PLAT094_BRF160_123K
;
PROBLEM: Ratio of Maximum / Minimum Residual Density ....      2.28 Report
RESPONSE: ...
;
_vrf_PLAT220_BRF160_123K
;
PROBLEM: Non-Solvent  Resd 1  C    Ueq(max)/Ueq(min) Range      5.4 Ratio
RESPONSE: ...
;
_vrf_PLAT222_BRF160_123K
;
PROBLEM: Non-Solv.  Resd 1  H    Uiso(max)/Uiso(min) Range      5.2 Ratio
RESPONSE: ...
;
_vrf_PLAT241_BRF160_123K
;
PROBLEM: High      'MainMol' Ueq as Compared to Neighbors of    C56 Check
RESPONSE: ...
;
_vrf_PLAT330_BRF160_123K
;
PROBLEM: Large Average Phenyl C-C Dist C2          -C24        1.42 Ang.
RESPONSE: ...
;
_vrf_PLAT911_BRF160_123K
;
PROBLEM: Missing FCF Refl Between Thmin & STh/L=      0.600      79 Report
RESPONSE: ...
;
_vrf_PLAT918_BRF160_123K
;
PROBLEM: Reflection(s) with I(obs) much Smaller I(calc) .      2 Check
RESPONSE: ...
;
# end Validation Reply Form
```

---

It is advisable to attempt to resolve as many as possible of the alerts in all categories. Often the minor alerts point to easily fixed oversights, errors and omissions in your CIF or refinement strategy, so attention to these fine details can be worthwhile. In order to resolve some of the more serious problems it may be necessary to carry out additional measurements or structure refinements. However, the purpose of your study may justify the reported deviations and the more serious of these should normally be commented upon in the discussion or experimental section of a paper or in the "special\_details" fields of the CIF. checkCIF was carefully designed to identify outliers and unusual parameters, but every test has its limitations and alerts that are not important in a particular case may appear. Conversely, the absence of alerts does not guarantee there are no aspects of the results needing attention. It is up to the individual to critically assess their own results and, if necessary, seek expert advice.

### **Publication of your CIF in IUCr journals**

A basic structural check has been run on your CIF. These basic checks will be run on all CIFs submitted for publication in IUCr journals (*Acta Crystallographica*, *Journal of Applied Crystallography*, *Journal of Synchrotron Radiation*); however, if you intend to submit to *Acta Crystallographica Section C* or *E* or *IUCrData*, you should make sure that full publication checks are run on the final version of your CIF prior to submission.

### **Publication of your CIF in other journals**

Please refer to the *Notes for Authors* of the relevant journal for any special instructions relating to CIF submission.

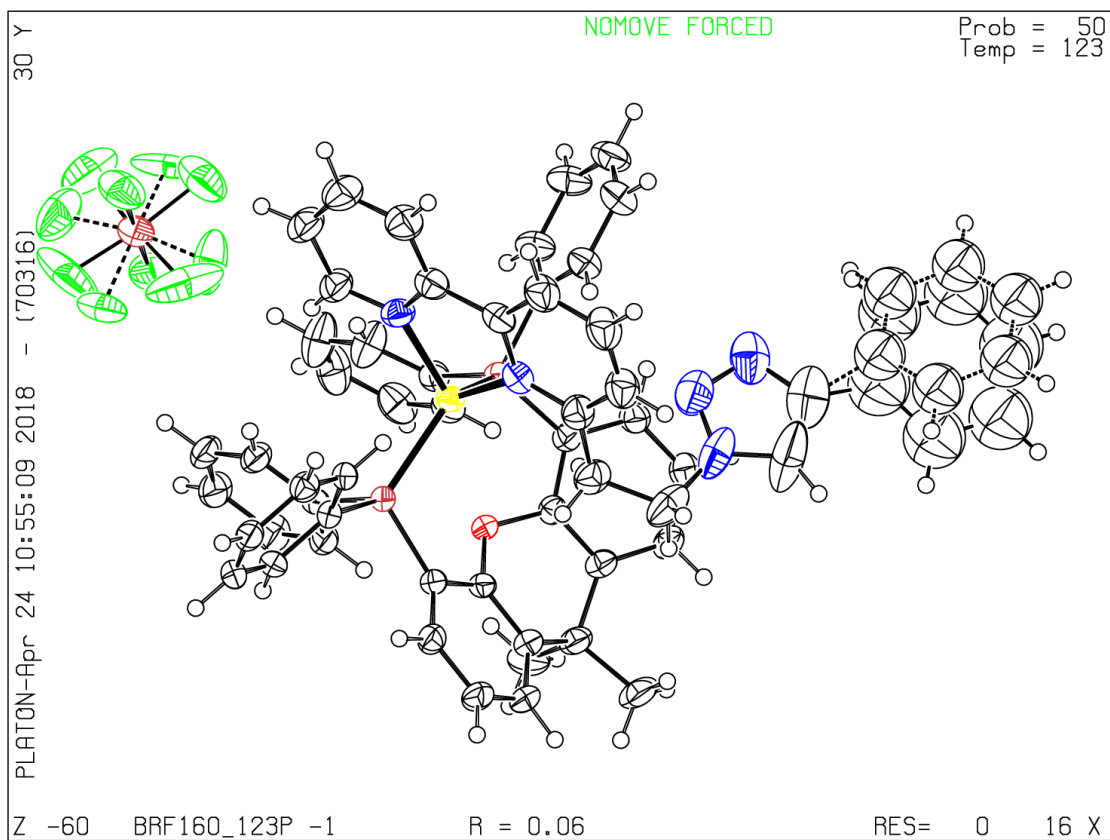

Supplement: s1 [file s1]
