# Supplementary material for: Desymmetrizing Heteroleptic [Cu(P^P)(N^N)][PF6] Compounds: Effects on Structural and Photophysical Properties, and Solution Dynamic Behavior
Source: MDPI journal article supplement (doi:10.3390/molecules26010125), 2020-12-29
Supplement: s1 [file s1]

## Desymmetrizing heteroleptic [Cu(P<sup>^</sup>P)(N<sup>^</sup>N)][PF<sub>6</sub>] compounds: effects on structural, dynamic and photophysical properties

Marco Meyer, Fabian Brunner, Alessandro Prescimone, Edwin C. Constable and Catherine E. Housecroft\*

Department of Chemistry, University of Basel, BPR 1096, Mattenstrasse 24a, CH-4058 Basel, Switzerland

### Table of contents

Figure S1. HMQC spectrum of **2**.

Figure S2. HMBC spectrum of **2**.

Figure S3. HMQC spectrum of **3**.

Figure S4. HMBC spectrum of **3**.

Figure S5. ORTEP representation of the structure of the [Cu(xantphos)(**3**)]<sup>+</sup> cation.

Figure S6.  $\pi$ -Stacking interaction in the [Cu(xantphos)(**3**)]<sup>+</sup> cation.

Figure S7. <sup>1</sup>H NMR spectrum of [Cu(POP)(**1**)]PF<sub>6</sub>.

Figure S8. HMQC spectrum of [Cu(POP)(**1**)]PF<sub>6</sub>.

Figure S9. HMBC spectrum of [Cu(POP)(**1**)]PF<sub>6</sub>.

Figure S10. Part of the <sup>1</sup>H NMR spectrum of [Cu(xantphos)(**1**)]PF<sub>6</sub>.

Figure S11. Part of the HMQC spectrum of [Cu(xantphos)(**1**)]PF<sub>6</sub>.

Figure S12. Part of the HMBC spectrum of [Cu(xantphos)(**1**)]PF<sub>6</sub>.

Figure S13. Aromatic region of the <sup>1</sup>H NMR spectrum of [Cu(POP)(**2**)]PF<sub>6</sub>.

Figure S14. Aromatic region of the HMQC spectrum of [Cu(POP)(**2**)]PF<sub>6</sub>,

Figure S15. Aromatic region of the HMBC spectrum of [Cu(POP)(**2**)]PF<sub>6</sub>

Figure S16. Aromatic region of the <sup>1</sup>H NMR spectrum of [Cu(xantphos)(**2**)]PF<sub>6</sub>.

Figure S17. Aromatic region of the HMQC spectrum of [Cu(xantphos)(**2**)]PF<sub>6</sub>.

Figure S18. Aromatic region of the HMBC spectrum of [Cu(xantphos)(**2**)]PF<sub>6</sub>.

Figure S19. Aromatic region of the <sup>1</sup>H NMR spectrum of [Cu(xantphos)(**3**)]PF<sub>6</sub>.

Figure S20. Aromatic region of the HMQC spectrum of [Cu(xantphos)(**3**)]PF<sub>6</sub>.

Figure S21. Aromatic region of the HMBC spectrum of [Cu(xantphos)(**3**)]PF<sub>6</sub>.

Figure S22. Aromatic regions of the <sup>1</sup>H NMR spectra of [Cu(POP)(**2**)]PF<sub>6</sub> and [Cu(xantphos)(**2**)]PF<sub>6</sub>.

Figure S23. Part of the NOESY spectra of [Cu(xantphos)(**2**)]PF<sub>6</sub> and [Cu(POP)(**2**)]PF<sub>6</sub>.

Figure S24. Cyclic voltammograms of [Cu(POP)(**2**)]PF<sub>6</sub> and [Cu(xantphos)(**2**)]PF<sub>6</sub>.

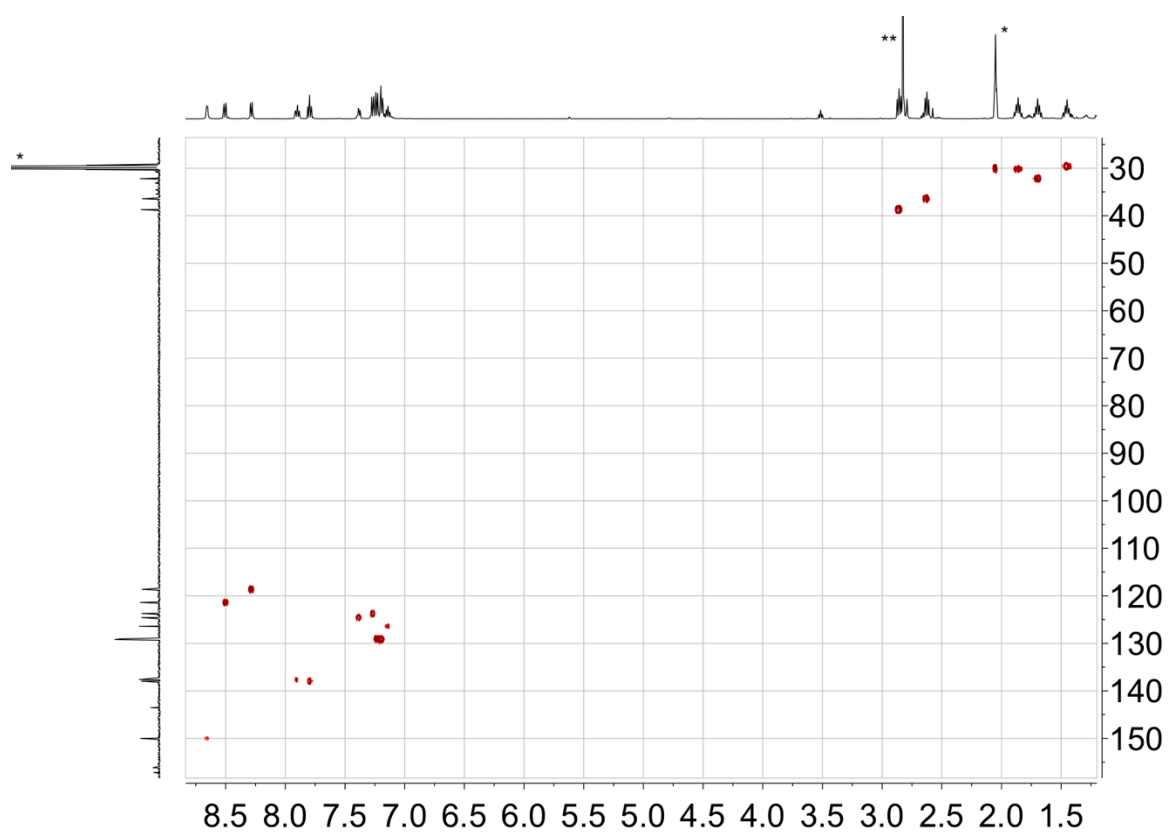

Figure S1. HMQC spectrum of **2** ( $^1\text{H}$  500 MHz,  $^{13}\text{C}$  126 MHz, acetone- $\text{d}_6$ , 298 K). \* = acetone- $\text{d}_6$  (in  $^{13}\text{C}\{^1\text{H}\}$ ) or residual acetone- $\text{d}_5$  (in  $^1\text{H}$ ); \*\* =  $\text{H}_2\text{O}$ .

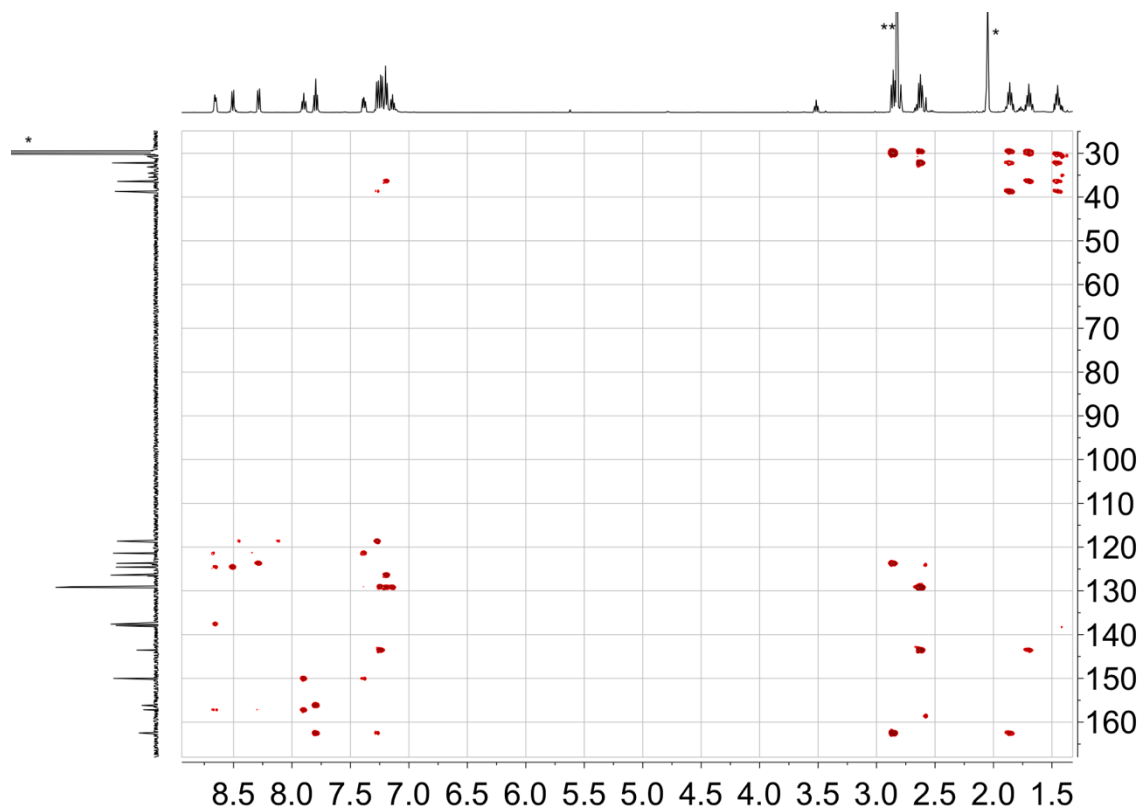

Figure S2. HMBC spectrum of **2** ( $^1\text{H}$  500 MHz,  $^{13}\text{C}$  126 MHz, acetone- $\text{d}_6$ , 298 K). \* = acetone- $\text{d}_6$  (in  $^{13}\text{C}\{^1\text{H}\}$ ) or residual acetone- $\text{d}_5$  (in  $^1\text{H}$ ); \*\* =  $\text{H}_2\text{O}$ .

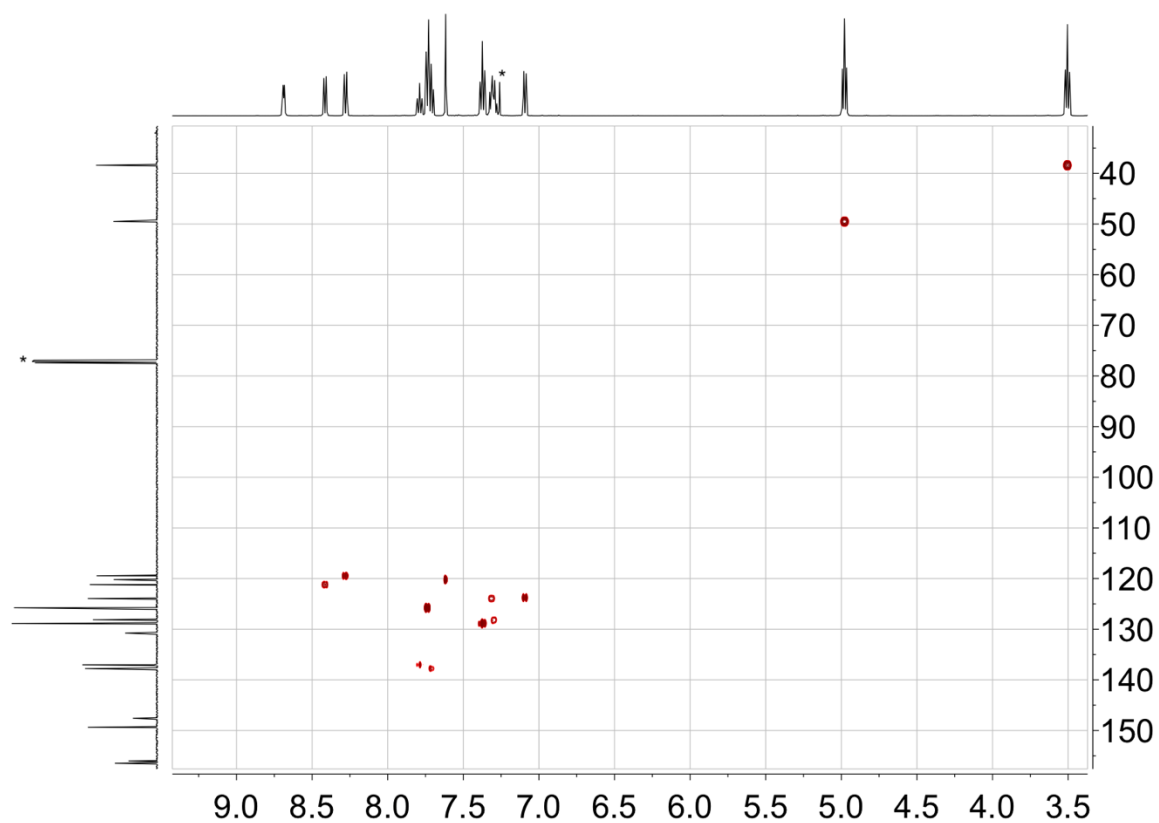

Figure S3. HMQC spectrum of **3** ( $^1\text{H}$  500 MHz,  $^{13}\text{C}$  126 MHz,  $\text{CDCl}_3$ , 298 K). \* =  $\text{CDCl}_3$  (in  $^{13}\text{C}\{^1\text{H}\}$ ) or residual  $\text{CHCl}_3$  (in  $^1\text{H}$ ); \*\* =  $\text{H}_2\text{O}$ .

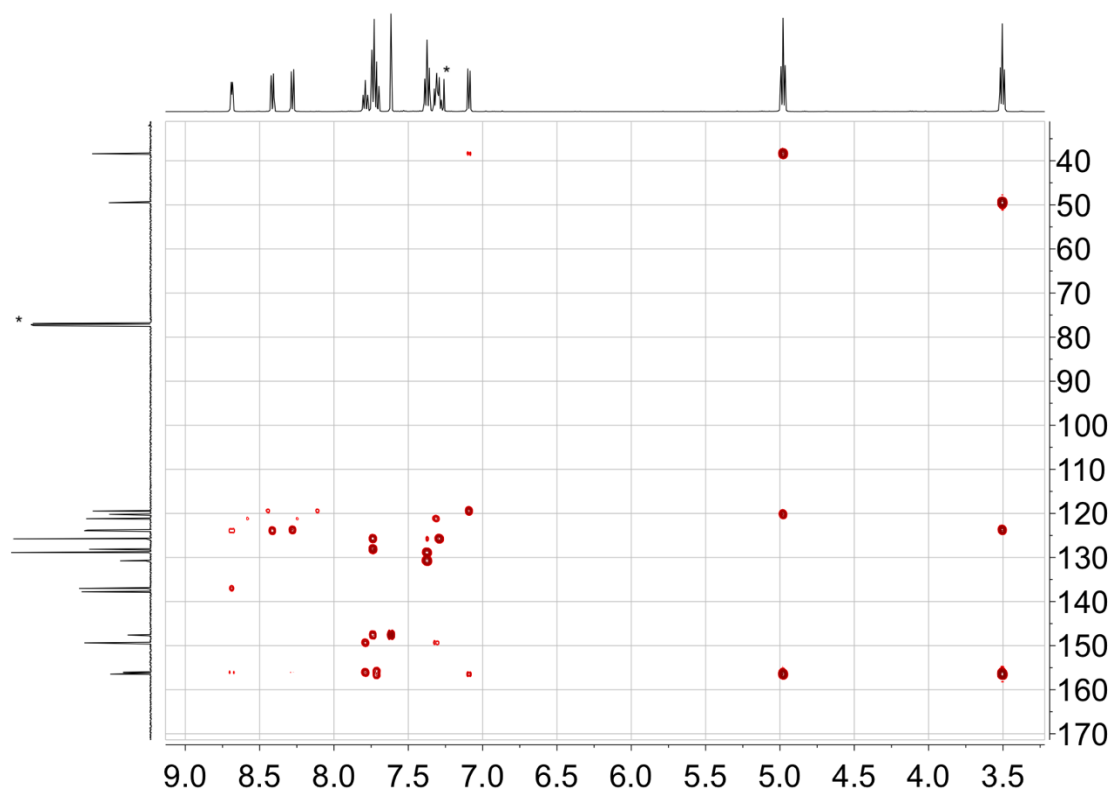

Figure S4. HMBC spectrum of **3** ( $^1\text{H}$  500 MHz,  $^{13}\text{C}$  126 MHz,  $\text{CDCl}_3$ , 298 K). \* =  $\text{CDCl}_3$  (in  $^{13}\text{C}\{^1\text{H}\}$ ) or residual  $\text{CHCl}_3$  (in  $^1\text{H}$ ); \*\* =  $\text{H}_2\text{O}$ .

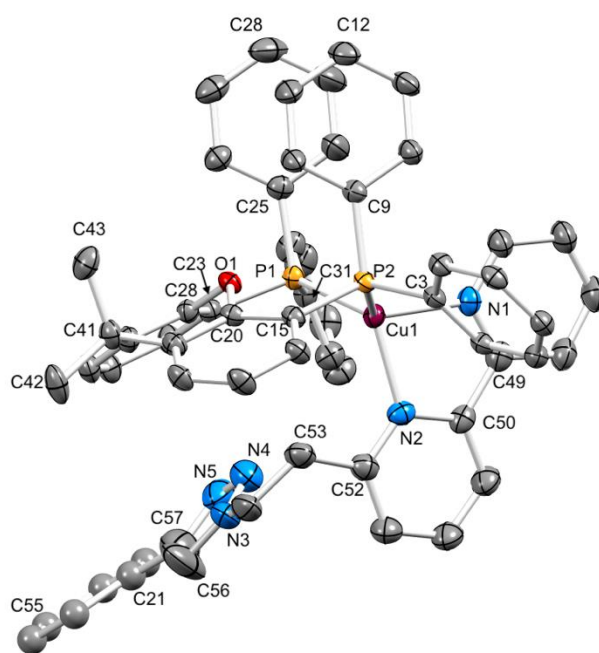

Figure S5. ORTEP representation of the structure of the  $[\text{Cu}(\text{xantphos})(\mathbf{3})]^+$  cation in  $[\text{Cu}(\text{xantphos})(\mathbf{3})][\text{PF}_6] \cdot 0.5\text{Et}_2\text{O}$ . Ellipsoids are drawn at a 40% probability level and H atoms are omitted; the phenyl ring in ligand **3** was orientationally disordered and the rings were refined isotropically.

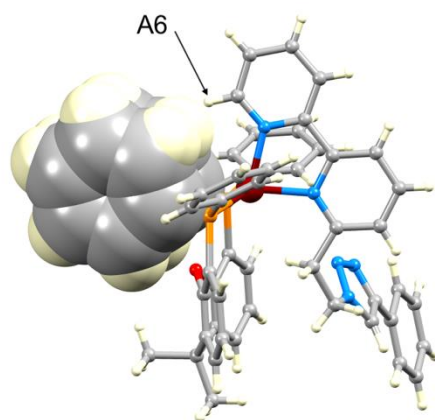

Figure S6.  $\pi$ -Stacking interaction in the  $[\text{Cu}(\text{xantphos})(\mathbf{3})]^+$  cation and the proximity of proton  $\text{H}^{\text{A6}}$  to these phenyl rings.

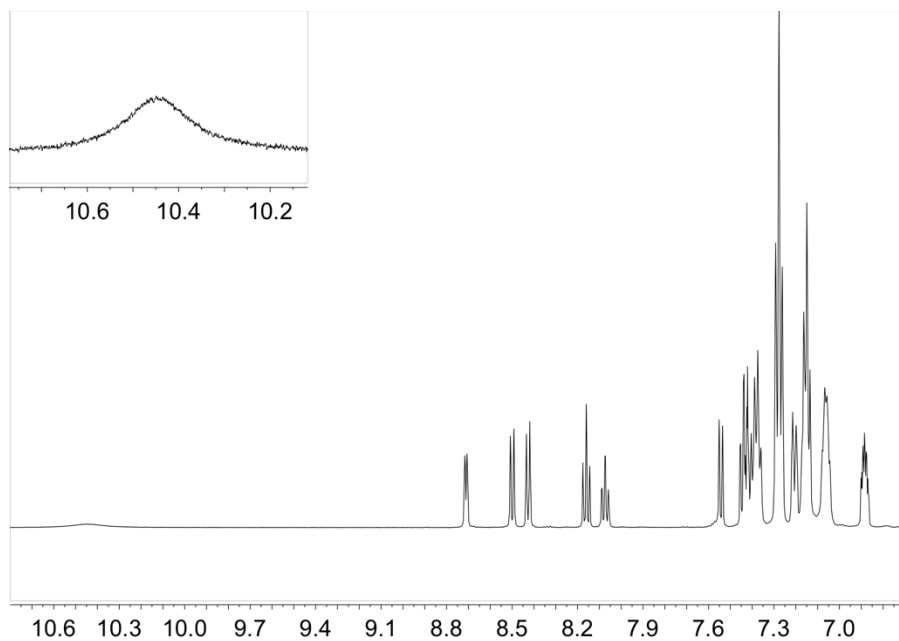

Figure S7.  $^1\text{H}$  NMR spectrum of  $[\text{Cu}(\text{POP})(\mathbf{1})][\text{PF}_6]$  (500 MHz, acetone- $\text{d}_6$ , 298 K) with the  $\text{CO}_2\text{H}$  signal inset.

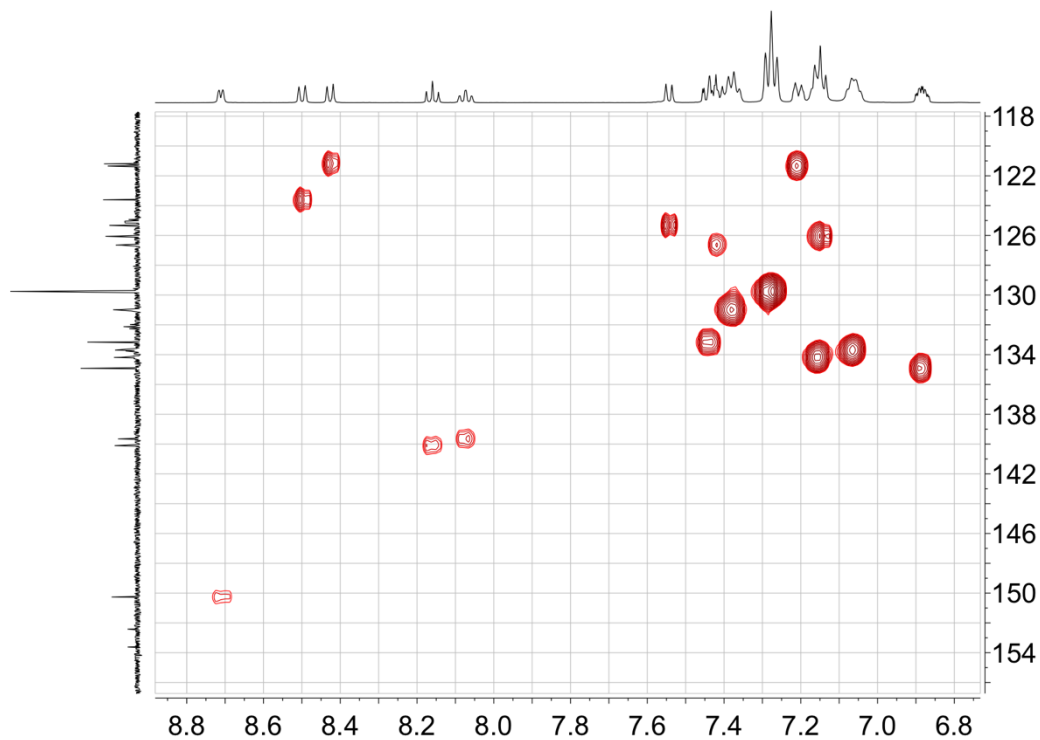

Figure S8. HMQC spectrum of  $[\text{Cu}(\text{POP})(\mathbf{1})][\text{PF}_6]$  ( $^1\text{H}$  500 MHz,  $^{13}\text{C}$  126 MHz, acetone- $\text{d}_6$ , 298 K).

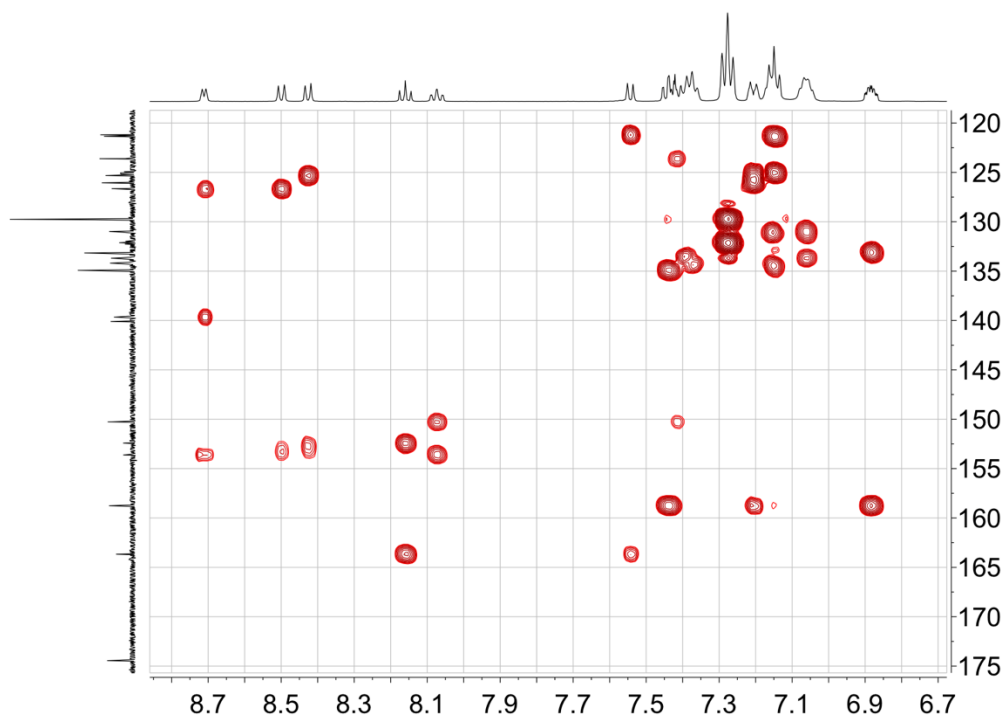

Figure S9. HMBC spectrum of  $[\text{Cu}(\text{POP})(\mathbf{1})][\text{PF}_6]$  ( $^1\text{H}$  500 MHz,  $^{13}\text{C}$  126 MHz, acetone- $\text{d}_6$ , 298 K).

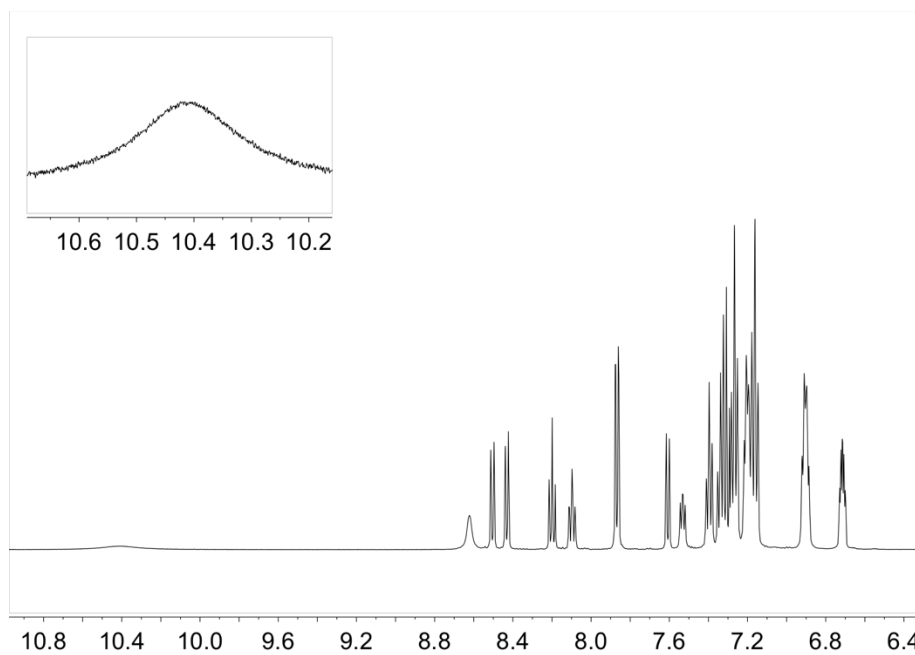

Figure S10. Part of the  $^1\text{H}$  NMR spectrum of  $[\text{Cu}(\text{xantphos})(\mathbf{1})][\text{PF}_6]$  (500 MHz, acetone- $\text{d}_6$ , 298 K) with the  $\text{CO}_2\text{H}$  signal inset.

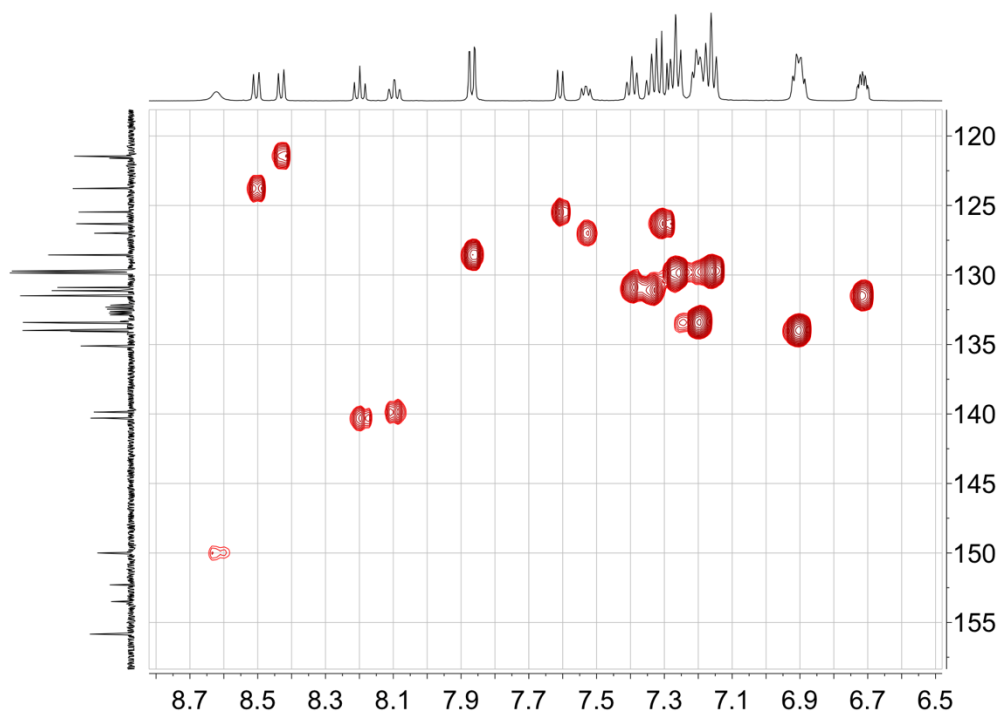

Figure S11. Part of the HMQC spectrum of  $[\text{Cu}(\text{xantphos})(\mathbf{1})][\text{PF}_6]$  ( $^1\text{H}$  500 MHz,  $^{13}\text{C}$  126 MHz, acetone- $\text{d}_6$ , 298 K).

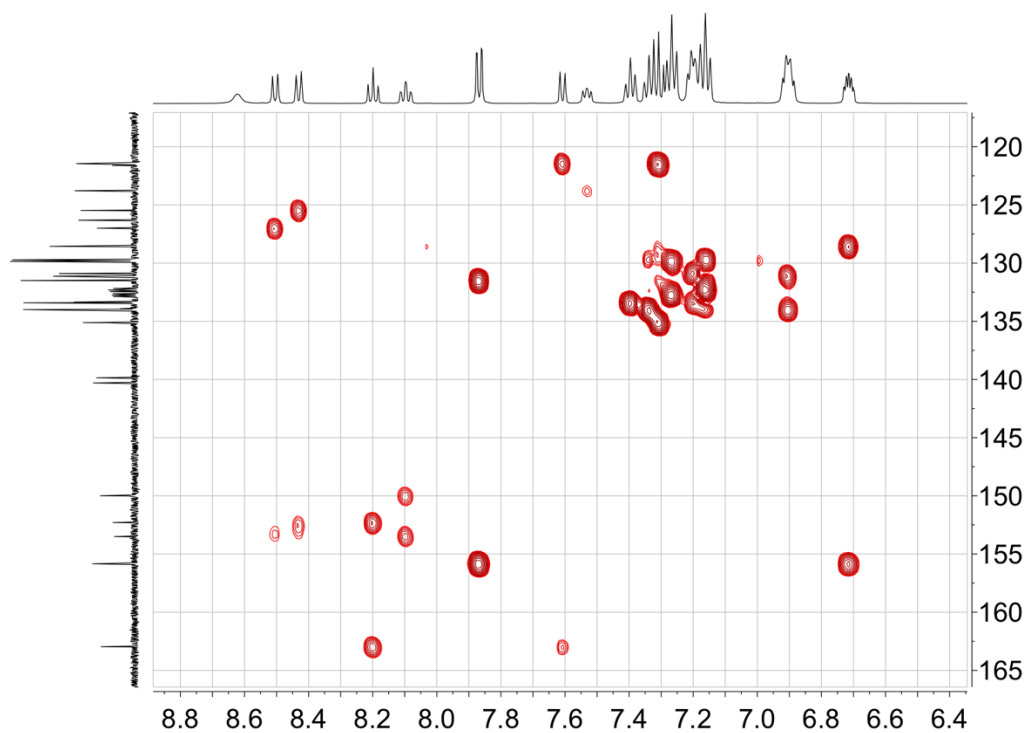

Figure S12. Part of the HMBC spectrum of  $[\text{Cu}(\text{xantphos})(\mathbf{1})][\text{PF}_6]$  ( $^1\text{H}$  500 MHz,  $^{13}\text{C}$  126 MHz, acetone- $\text{d}_6$ , 298 K).

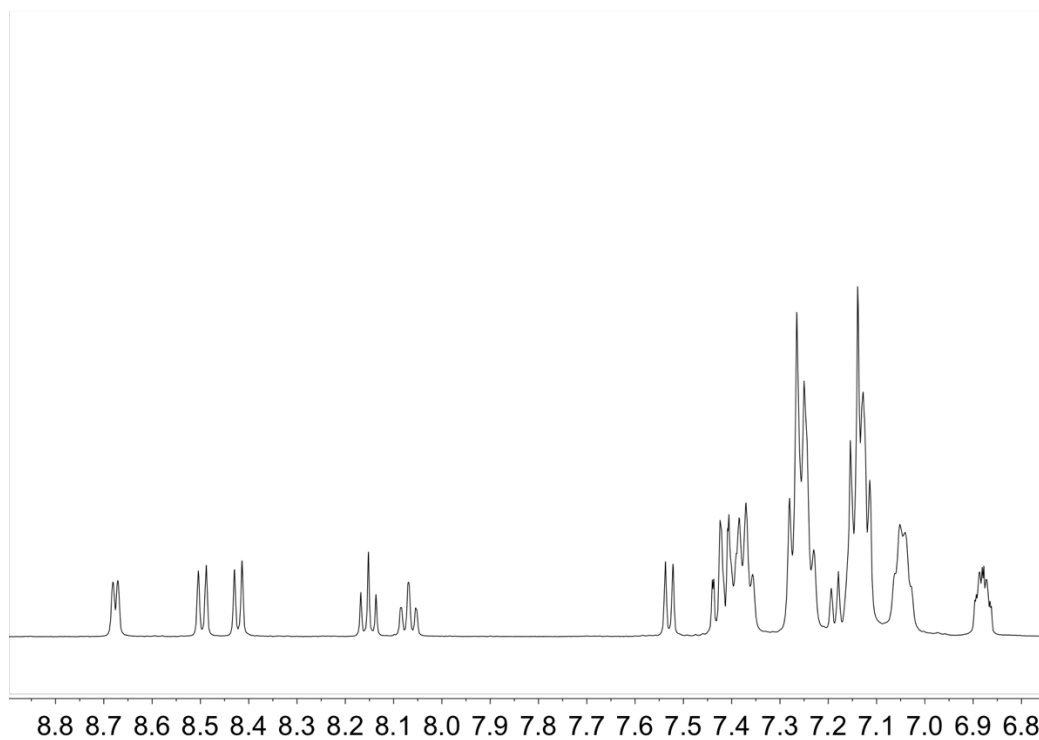

Figure S13. Aromatic region of the  $^1\text{H}$  NMR spectrum of  $[\text{Cu}(\text{POP})(\mathbf{2})][\text{PF}_6]$  (500 MHz, acetone- $\text{d}_6$ , 298 K).

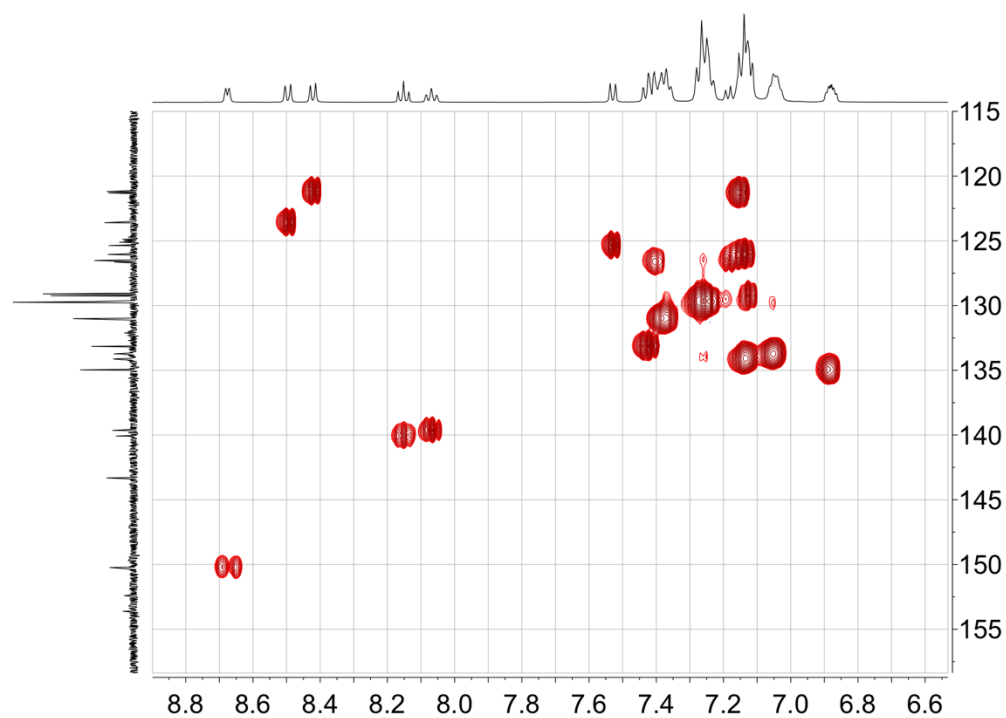

Figure S14. Aromatic region of the HMQC spectrum of  $[\text{Cu}(\text{POP})(\mathbf{2})][\text{PF}_6]$  ( $^1\text{H}$  500 MHz,  $^{13}\text{C}$  126 MHz, acetone- $\text{d}_6$ , 298 K).



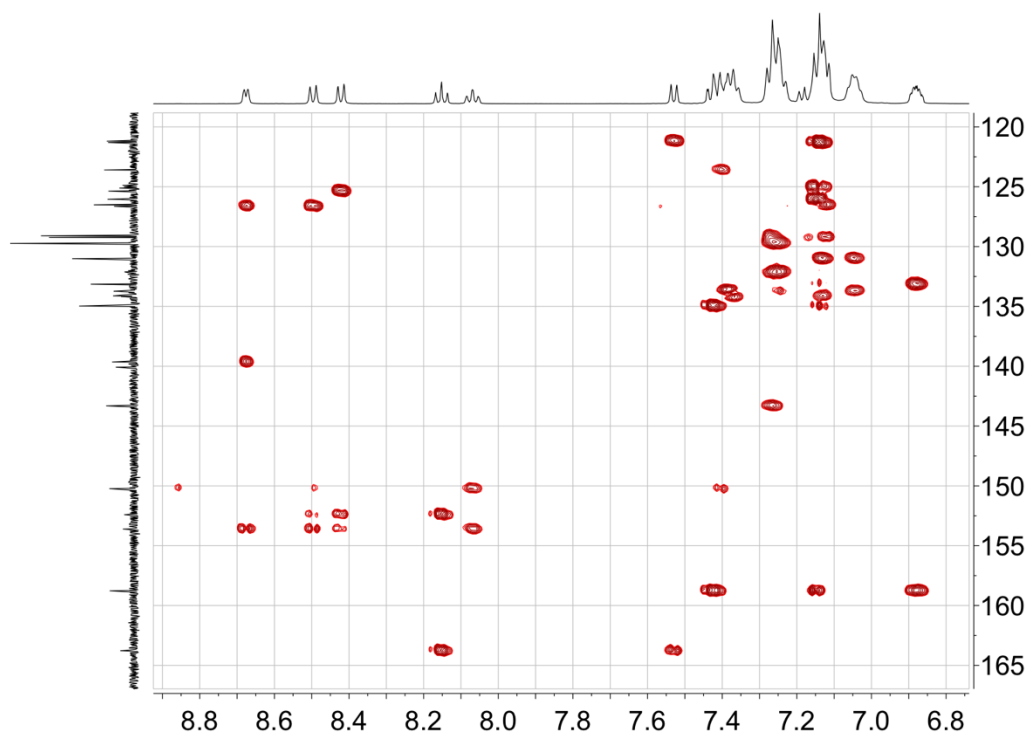

Figure S15. Aromatic region of the HMBC spectrum of  $[\text{Cu}(\text{POP})(\mathbf{2})][\text{PF}_6]$  ( $^1\text{H}$  500 MHz,  $^{13}\text{C}$  126 MHz, acetone- $\text{d}_6$ , 298 K).

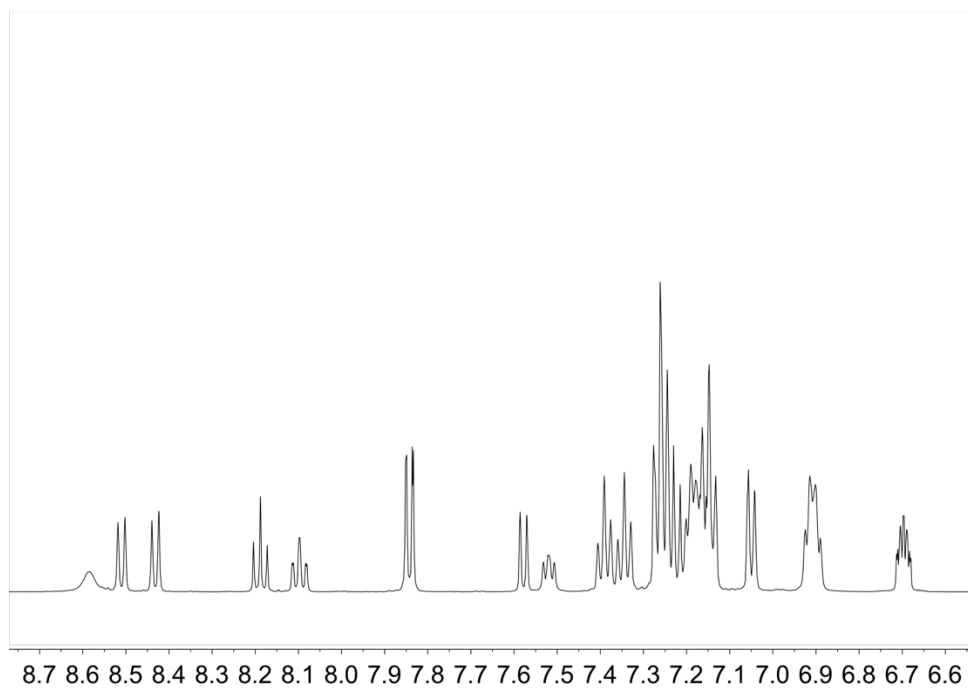

Figure S16. Aromatic region of the  $^1\text{H}$  NMR spectrum of  $[\text{Cu}(\text{xantphos})(\mathbf{2})][\text{PF}_6]$  (500 MHz, acetone- $\text{d}_6$ , 298 K).

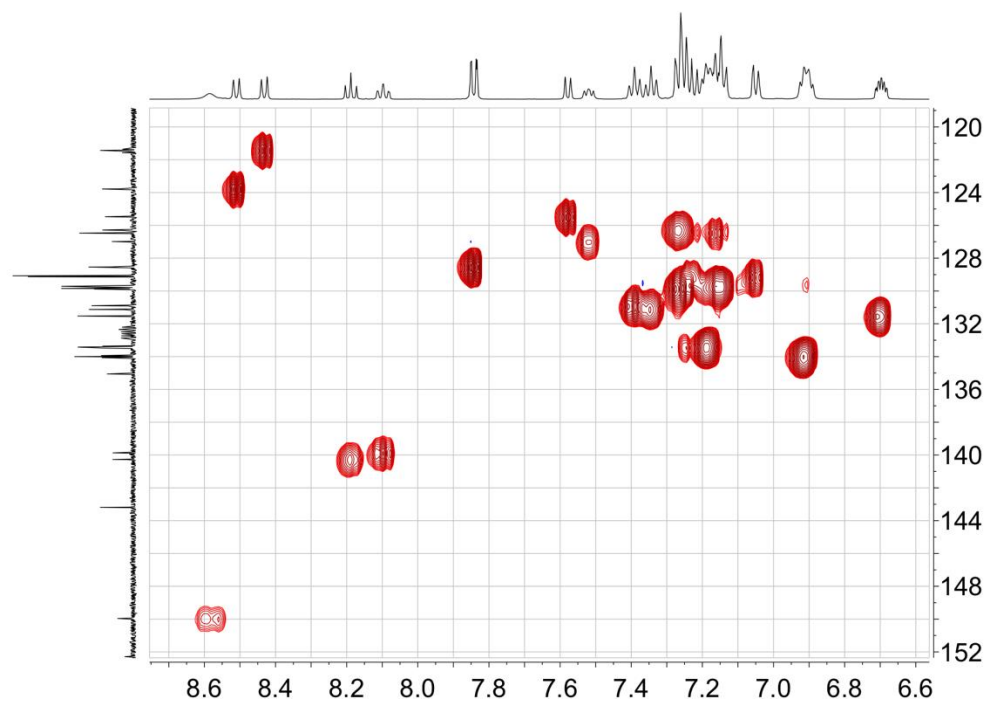

Figure S17. Aromatic region of the HMQC spectrum of  $[\text{Cu}(\text{xantphos})(\mathbf{2})][\text{PF}_6]$  ( $^1\text{H}$  500 MHz,  $^{13}\text{C}$  126 MHz, acetone- $\text{d}_6$ , 298 K).

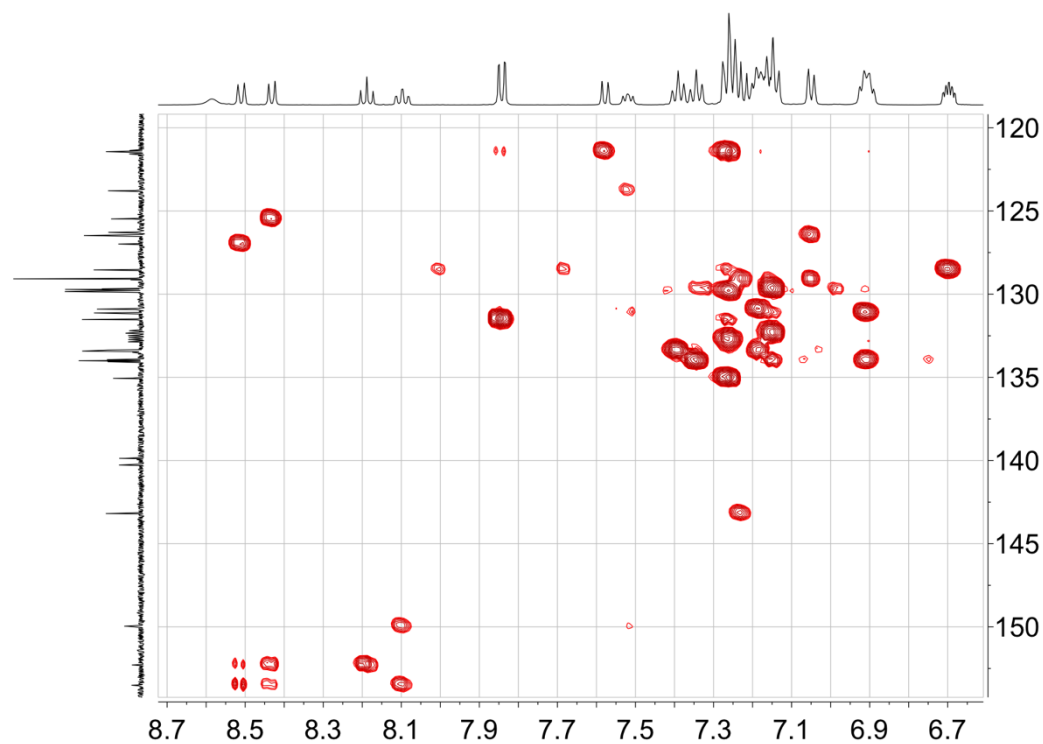

Figure S18. Aromatic region of the HMBC spectrum of  $[\text{Cu}(\text{xantphos})(\mathbf{2})][\text{PF}_6]$  ( $^1\text{H}$  500 MHz,  $^{13}\text{C}$  126 MHz, acetone- $\text{d}_6$ , 298 K).

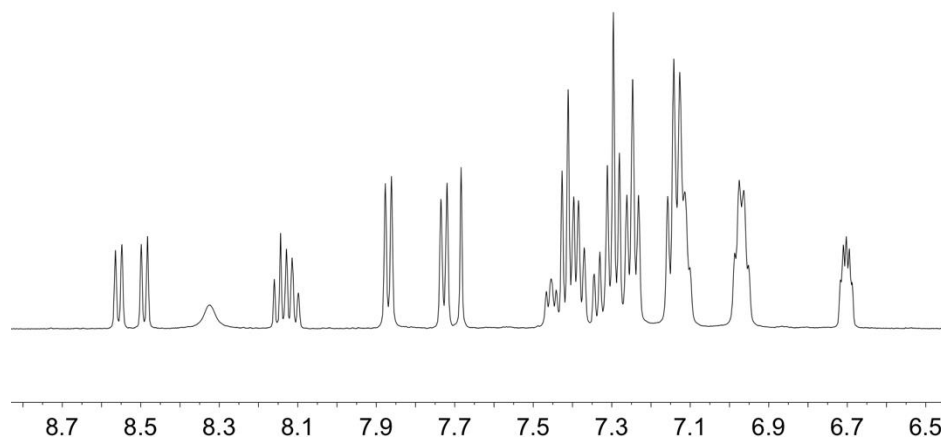

Figure S19. Aromatic region of the  $^1\text{H}$  NMR spectrum of  $[\text{Cu}(\text{xantphos})(\mathbf{3})][\text{PF}_6]$  (500 MHz, acetone- $\text{d}_6$ , 298 K).

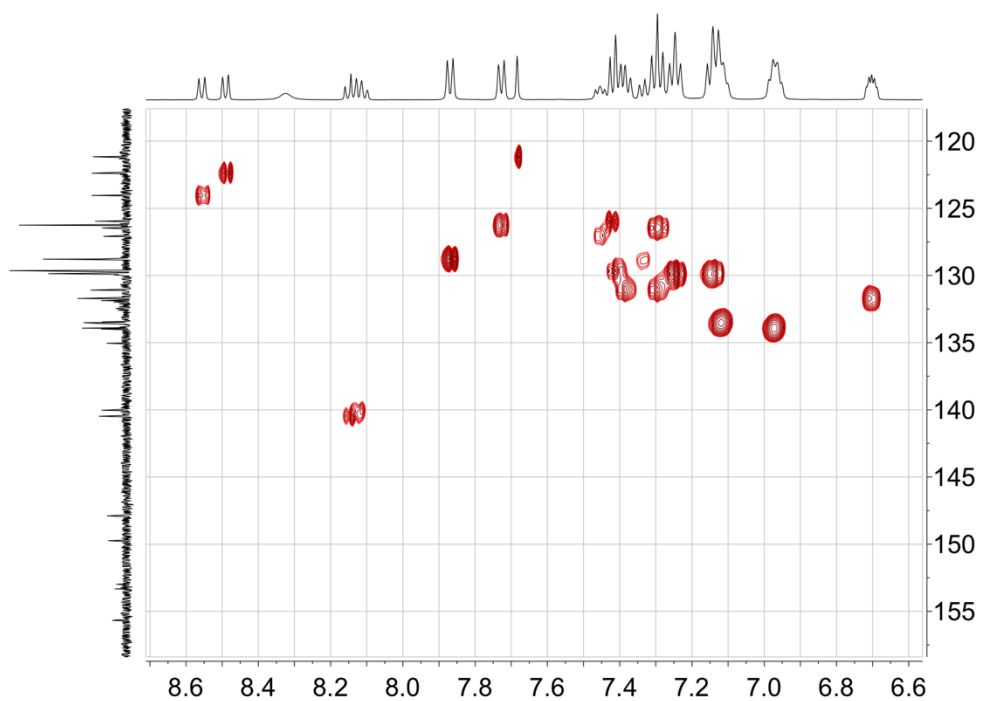

Figure S20. Aromatic region of the HMQC spectrum of  $[\text{Cu}(\text{xantphos})(\mathbf{3})][\text{PF}_6]$  ( $^1\text{H}$  500 MHz,  $^{13}\text{C}$  126 MHz, acetone- $\text{d}_6$ , 298 K).

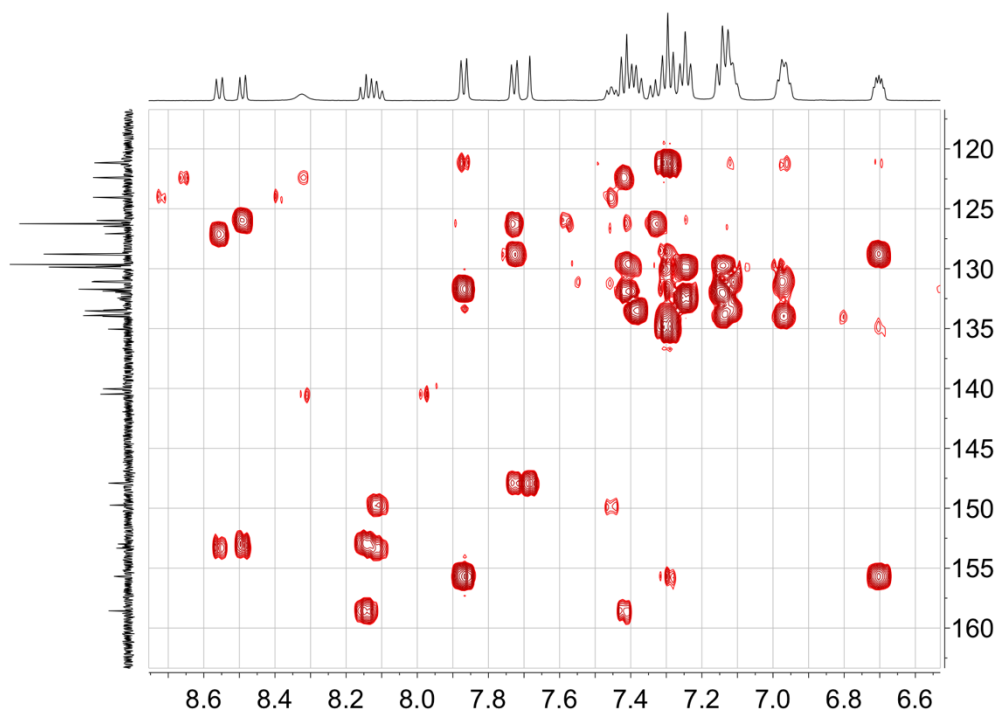

Figure S21. Aromatic region of the HMBC spectrum of  $[\text{Cu}(\text{xantphos})(\mathbf{3})][\text{PF}_6]$  ( $^1\text{H}$  500 MHz,  $^{13}\text{C}$  126 MHz, acetone- $\text{d}_6$ , 298 K).

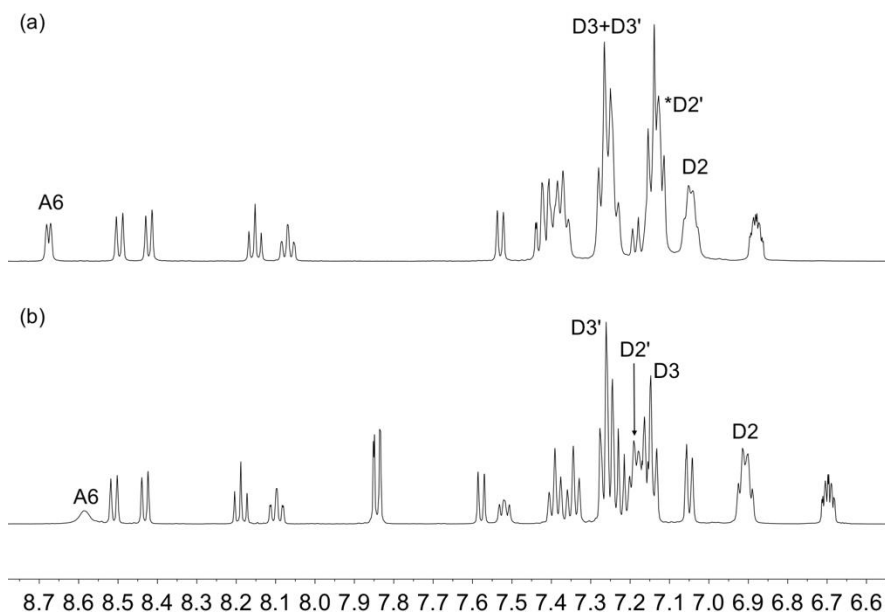

Figure S22. Aromatic regions of the  $^1\text{H}$  NMR spectra (500 MHz, acetone- $\text{d}_6$ , 298 K) of (a)  $[\text{Cu}(\text{POP})(\mathbf{2})][\text{PF}_6]$  and (b)  $[\text{Cu}(\text{xantphos})(\mathbf{2})][\text{PF}_6]$ . Compare with Figure 2 in the main article.

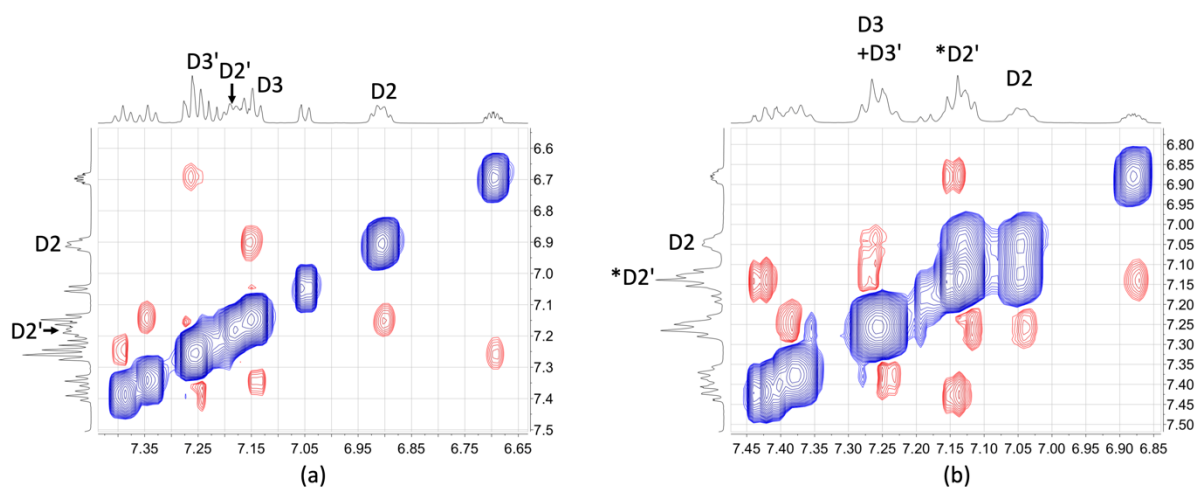

Figure S23. Part of the NOESY spectra (500 MHz, acetone- $d_6$ , 298 K) of (a)  $[\text{Cu}(\text{xantphos})(\mathbf{2})][\text{PF}_6]$  and (b)  $[\text{Cu}(\text{POP})(\mathbf{2})][\text{PF}_6]$ . EXSY peaks appear in the opposite phase (blue) to NOESY crosspeaks (red), and are observed between  $\text{H}^{\text{D2}}$  and  $\text{H}^{\text{D2'}}$  in  $[\text{Cu}(\text{POP})(\mathbf{2})][\text{PF}_6]$  but not in  $[\text{Cu}(\text{xantphos})(\mathbf{2})][\text{PF}_6]$ . \* The signal for  $\text{D2'}$  overlaps with signals assigned to E2, C4 and C6.

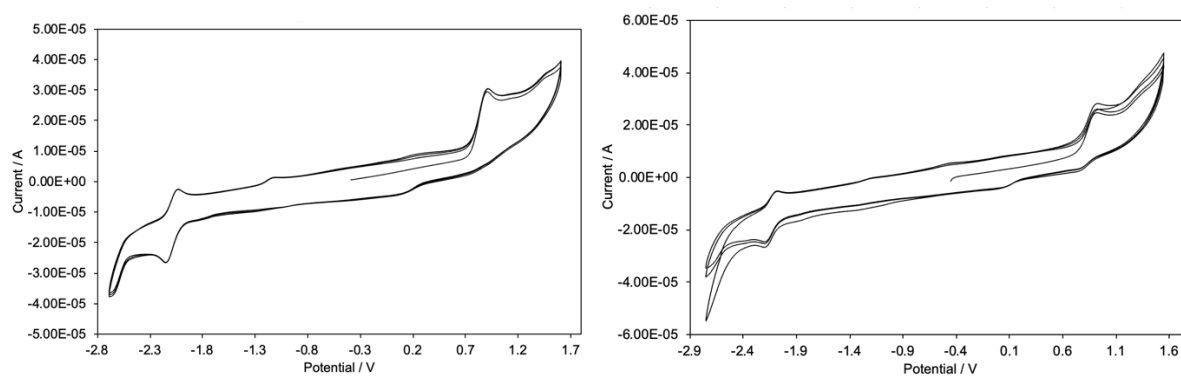

Figure S24. Three successive scans in the cyclic voltammograms of  $[\text{Cu}(\text{POP})(\mathbf{2})][\text{PF}_6]$  (left) and  $[\text{Cu}(\text{xantphos})(\mathbf{2})][\text{PF}_6]$  (right). Propylene carbonate solutions, and referenced internally to  $\text{Fc}/\text{Fc}^+ = 0.0 \text{ V}$ ;  $[\text{t}^{\text{Bu}}\text{N}][\text{PF}_6]$  as supporting electrolyte and scan rate of  $0.1 \text{ V s}^{-1}$ .
